# Supplementary material for: Examining the impact of excessive daytime sleepiness on utility scores in patients with obstructive sleep apnoea and/or narcolepsy in five European countries
Source: PubMed Central journal article supplement (PMC9404621; doi:10.1186/s12883-022-02827-7), 2022-08-25
Supplement: 12883_2022_2827_MOESM1_ESM.pdf [file 12883_2022_2827_MOESM1_ESM.pdf]

**Additional File 1**

**Table S1. Parameter estimates for the models run**

| <b>Model</b>                                        | <b>Estimate</b>    | <b>SE</b> |
|-----------------------------------------------------|--------------------|-----------|
| <i>(a) GLM - ESS score as a continuous variable</i> |                    |           |
| (Intercept)                                         | 0.6241             | 0.0475    |
| ESS Score                                           | -0.0068            | 0.0009    |
| OSA without narcolepsy                              | -0.0221            | 0.0367    |
| OSA and narcolepsy                                  | -0.1641            | 0.0627    |
| Age                                                 | 0.0006             | 0.0004    |
| CCI                                                 | -0.0353            | 0.0041    |
| Female                                              | -0.0582            | 0.0119    |
| Married                                             | 0.0287             | 0.0118    |
| Medium Income (20,000-39,999)                       | 0.0494             | 0.0124    |
| High Income ( $\geq 40,000$ )                       | 0.0525             | 0.0142    |
| BMI $\geq 25$                                       | -0.0083            | 0.0136    |
| Former smoker                                       | 0.0050             | 0.0120    |
| Current smoker                                      | -0.0015            | 0.0142    |
| Drinks alcohol                                      | 0.0506             | 0.0124    |
| Exercises                                           | 0.1071             | 0.0104    |
| (Scale)                                             | 0.061 <sup>a</sup> | 0.0018    |
| <i>(b) GLM - US/RoW cutoffs (reference 0-10)</i>    |                    |           |
| (Intercept)                                         | 0.5909             | 0.0466    |
| Mild EDS (ESS, 11-12)                               | -0.0134            | 0.0174    |
| Moderate EDS (ESS, 13-15)                           | -0.0505            | 0.0165    |
| Severe EDS (ESS, 16-24)                             | -0.1132            | 0.0159    |
| OSA without narcolepsy                              | -0.0238            | 0.0367    |
| OSA and narcolepsy                                  | -0.1667            | 0.0626    |

|                                              |                    |        |
|----------------------------------------------|--------------------|--------|
| Age                                          | 0.0006             | 0.0004 |
| CCI                                          | -0.0354            | 0.0041 |
| Female                                       | -0.0573            | 0.0119 |
| Married                                      | 0.0301             | 0.0118 |
| Medium Income (20,000-39,999)                | 0.0498             | 0.0124 |
| High Income ( $\geq 40,000$ )                | 0.0538             | 0.0142 |
| BMI $\geq 25$                                | -0.0088            | 0.0136 |
| Former smoker                                | 0.0046             | 0.0120 |
| Current smoker                               | -0.0040            | 0.0142 |
| Drinks alcohol                               | 0.0503             | 0.0124 |
| Exercises                                    | 0.1057             | 0.0104 |
| (Scale)                                      | 0.061 <sup>a</sup> | 0.0018 |
| <i>(c)</i> GLM - UK cutoffs (reference 0-10) |                    |        |
| Intercept                                    | 0.5918             | 0.0466 |
| Mild EDS (ESS, 11-14)                        | -0.0268            | 0.0138 |
| Moderate EDS (ESS, 15-18)                    | -0.0789            | 0.0167 |
| Severe EDS (ESS, 19-24)                      | -0.1513            | 0.0236 |
| OSA without narcolepsy                       | -0.0275            | 0.0367 |
| OSA and narcolepsy                           | -0.1640            | 0.0626 |
| Age                                          | 0.0007             | 0.0004 |
| CCI                                          | -0.0354            | 0.0041 |
| Female                                       | -0.0575            | 0.0119 |
| Married                                      | 0.0295             | 0.0117 |
| Medium Income (20,000-39,999)                | 0.0497             | 0.0124 |
| High Income ( $\geq 40,000$ )                | 0.0538             | 0.0142 |
| BMI $\geq 25$                                | -0.0107            | 0.0136 |
| Former smoker                                | 0.0032             | 0.0120 |
| Current smoker                               | -0.0048            | 0.0142 |

|                                                      |                    |        |
|------------------------------------------------------|--------------------|--------|
| Drinks alcohol                                       | 0.0494             | 0.0124 |
| Exercises                                            | 0.1068             | 0.0104 |
| (Scale)                                              | 0.060 <sup>a</sup> | 0.0018 |
| <i>(d)</i> Piecewise linear with breakpoint at 11.29 |                    |        |
| Intercept                                            | 0.6084             | 0.0480 |
| ESS Slope 1 (ESS, <11.29)                            | -0.0028            | 0.0018 |
| ESS Slope 2 (ESS, >11.29)                            | -0.0134            | 0.0031 |
| OSA without narcolepsy                               | -0.0262            | 0.0368 |
| OSA and narcolepsy                                   | -0.1621            | 0.0628 |
| Age                                                  | 0.0006             | 0.0004 |
| CCI                                                  | -0.0353            | 0.0041 |
| Female                                               | -0.0579            | 0.0119 |
| Married                                              | 0.0295             | 0.0118 |
| Medium Income (20,000-39,999)                        | 0.0496             | 0.0124 |
| High Income ( $\geq 40,000$ )                        | 0.0534             | 0.0143 |
| BMI $\geq 25$                                        | -0.0094            | 0.0137 |
| Former smoker                                        | 0.0045             | 0.0121 |
| Current smoker                                       | -0.0028            | 0.0142 |
| Drinks alcohol                                       | 0.0495             | 0.0125 |
| Exercises                                            | 0.1061             | 0.0104 |
| <i>(e)</i> Linear spline with breakpoint at 11       |                    |        |
| Intercept                                            | 0.6080             | 0.0479 |
| ESS Slope 1 (ESS, 0-11)                              | -0.0026            | 0.0016 |
| ESS Slope 2 (ESS, 12-24)                             | -0.0131            | 0.0022 |
| OSA without narcolepsy                               | -0.0260            | 0.0368 |
| OSA and narcolepsy                                   | -0.1622            | 0.0628 |
| Age                                                  | 0.0006             | 0.0004 |
| CCI                                                  | -0.0352            | 0.0041 |

|                               |         |        |
|-------------------------------|---------|--------|
| Female                        | -0.0579 | 0.0119 |
| Married                       | 0.0295  | 0.0118 |
| Medium Income (20,000-39,999) | 0.0496  | 0.0124 |
| High Income ( $\geq 40,000$ ) | 0.0534  | 0.0143 |
| BMI $\geq 25$                 | -0.0095 | 0.0137 |
| Former smoker                 | 0.0045  | 0.0121 |
| Current smoker                | -0.0028 | 0.0142 |
| Drinks alcohol                | 0.0496  | 0.0124 |
| Exercises                     | 0.1060  | 0.0104 |

a. Maximum likelihood estimate.

BMI: body mass index; CCI: Charlson Comorbidity Index; EDS: excessive daytime sleepiness; ESS: Epworth Sleepiness Scale; OSA: obstructive sleep apnoea; SE: standard error; RoW: rest of world; UK: United Kingdom; US: United States.

**Table S2. Parameter estimates for linear spline regression model: estimation sample**

|                               | <b>Estimate</b> | <b>Std. Error</b> | <b>Difference from full sample</b> |
|-------------------------------|-----------------|-------------------|------------------------------------|
| Intercept                     | 0.6163          | 0.0541            | 0.0083                             |
| ESS, 0-11                     | -0.0019         | 0.0018            | 0.0007                             |
| ESS, 12-24                    | -0.0126         | 0.0025            | 0.0005                             |
| OSA without narcolepsy        | -0.0304         | 0.0415            | -0.0043                            |
| OSA and narcolepsy            | -0.1600         | 0.0699            | 0.0022                             |
| Age                           | 0.0006          | 0.0005            | <0.0001                            |
| CCI                           | -0.0366         | 0.0046            | -0.0013                            |
| Female                        | -0.0618         | 0.0134            | -0.0039                            |
| Married                       | 0.0193          | 0.0133            | -0.0102                            |
| Medium Income (20,000-39,999) | 0.0506          | 0.0139            | 0.0009                             |
| High Income ( $\geq 40,000$ ) | 0.0533          | 0.0160            | -0.0001                            |
| BMI $\geq 25$                 | -0.0102         | 0.0154            | -0.0007                            |
| Former smoker                 | 0.0101          | 0.0135            | 0.0056                             |
| Current smoker                | 0.0006          | 0.0158            | 0.0034                             |
| Drinks alcohol                | 0.0430          | 0.0139            | -0.0066                            |
| Exercises                     | 0.1069          | 0.0117            | 0.0009                             |

BMI: body mass index; CCI: Charlson Comorbidity Index; EDS: excessive daytime sleepiness; ESS: Epworth

Sleepiness Scale; OSA: obstructive sleep apnoea; SE: standard error

**Table S3. Fit statistics of estimation sample: overall and by EQ-5D quartile**

| <b>R2</b>       | <b>RMSE</b> | <b>MAE</b>           | <b>Prediction Error</b> |
|-----------------|-------------|----------------------|-------------------------|
| 0.181           | 0.244       | 0.186                | 0.358                   |
| <b>Quartile</b> | <b>RMSE</b> | <b>Minimum EQ-5D</b> | <b>Maximum EQ-5D</b>    |
| 1st             | 0.382       | -0.358               | 0.536                   |
| 2nd             | 0.100       | 0.536                | 0.755                   |
| 3rd             | 0.159       | 0.755                | 0.887                   |
| 4th             | 0.239       | 0.887                | 1.000                   |

EQ-5D: EuroQoL- 5 Dimensions; MAE: mean absolute error; RMSE: root mean square error.

**Table S4. Slope estimates for piecewise linear regression model with breakpoint of ESS score 11.00:**

**estimation sample**

|                      | <b>Estimate</b> | <b>SE</b> | <b>t-value</b> | <b>95% CI</b>      |
|----------------------|-----------------|-----------|----------------|--------------------|
| Slope 1 (ESS, 0-11)  | -0.0019         | 0.0021    | -0.943         | [-0.006; 0.0021]   |
| Slope 2 (ESS, 12-24) | -0.0126         | 0.0035    | -3.603         | [-0.0194; -0.0057] |

CI: confidence interval; ESS: Epworth Sleepiness Scale; SE: standard error.

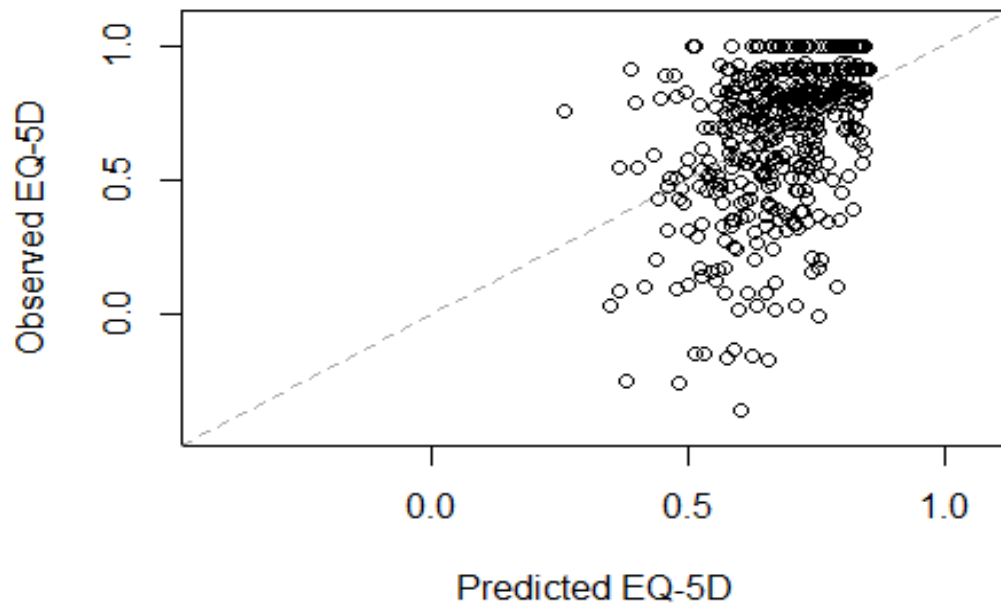

**Figure S1. Observed versus predicted EQ-5D utility: estimation sample**  
EQ-5D: EuroQoL- 5 Dimensions.



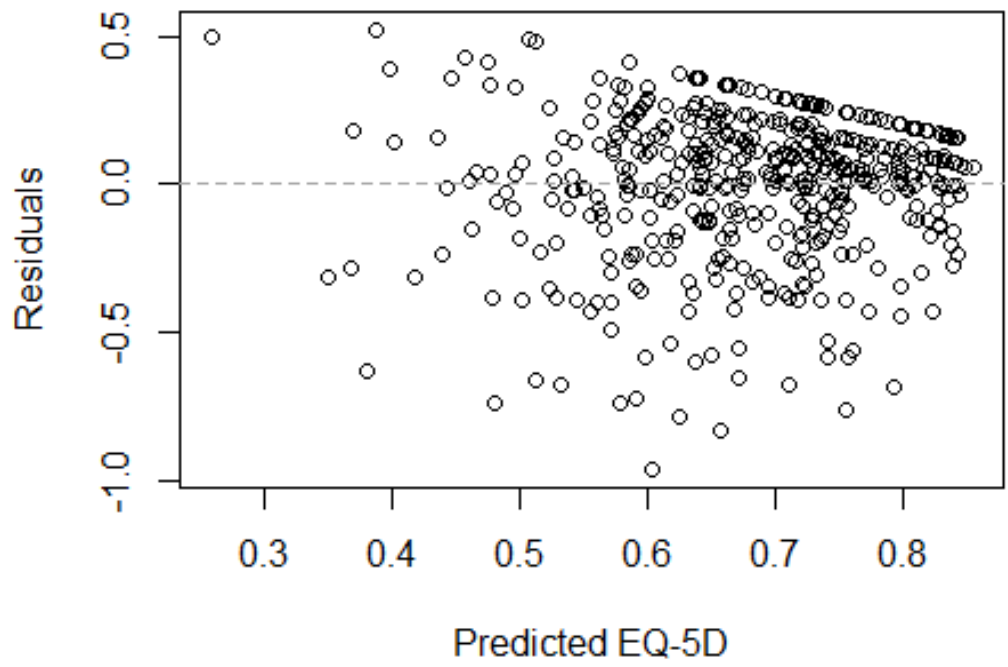

**Figure S2. Residual plot for observed versus predicted EQ-5D utility: estimation sample EQ-5D: EuroQoL-5 Dimensions.**
